# Supplementary material
Source: ML conference proceedings conference paper supplement (https://proceedings.mlr.press/v38/wang15c.html)
Supplement: Supplementary file 1 [file wang15c-supp.pdf]

## Appendix A. Analysis of the active norm sampling algorithm

*Proof of Lemma 1.* This lemma is a direct corollary of Theorem 2 from [15]. First, let  $P_i = \hat{c}_i/\hat{f}$  be the probability of selecting the  $i$ -th column of  $\mathbf{M}$ . By assumption, we have  $P_i \geq \frac{1-\alpha}{1+\alpha} \|\mathbf{x}_i\|_2^2 / \|\mathbf{M}\|_F^2$ . Applying Theorem 2<sup>3</sup> from [15] we have that with probability at least  $1 - \delta$ , there exists an orthonormal set of vectors  $\mathbf{y}^{(1)}, \dots, \mathbf{y}^{(k)} \in \mathbb{R}^{n_1}$  in  $\text{span}(\mathbf{C})$  such that

$$\left\| \mathbf{M} - \left( \sum_{j=1}^k \mathbf{y}^{(j)} \mathbf{y}^{(j)\top} \right) \mathbf{M} \right\|_F^2 \leq \|\mathbf{M} - \mathbf{M}_k\|_F^2 + \frac{(1+\alpha)k}{(1-\alpha)\delta s} \|\mathbf{M}\|_F^2. \quad (29)$$

Finally, to complete the proof, note that every column of  $\left( \sum_{j=1}^k \mathbf{y}^{(j)} \mathbf{y}^{(j)\top} \right) \mathbf{M}$  can be represented as a linear combination of columns in  $\mathbf{C}$ ; furthermore,

$$\|\mathbf{M} - \mathcal{P}_C(\mathbf{M})\|_F = \min_{\mathbf{X} \in \mathbb{R}^{k \times n_2}} \|\mathbf{M} - \mathbf{C}\mathbf{X}\|_F \leq \left\| \mathbf{M} - \left( \sum_{j=1}^k \mathbf{y}^{(j)} \mathbf{y}^{(j)\top} \right) \mathbf{M} \right\|_F. \quad (30)$$

□

*Proof of Theorem 1.* First, set  $m_1 = \Omega(\mu_1 \log(n_2/\delta_1))$  we have that with probability  $\geq 1 - \delta_1$  the inequality

$$(1-\alpha)\|\mathbf{x}_i\|_2^2 \leq \hat{c}_i \leq (1+\alpha)\|\mathbf{x}_i\|_2^2$$

holds with  $\alpha = 0.5$  for every column  $i$ , using Lemma 2. Next, putting  $s \geq 6k/\delta_2 \varepsilon^2$  and applying Lemma 1 we get

$$\|\mathbf{M} - \mathcal{P}_C(\mathbf{M})\|_F \leq \|\mathbf{M} - \mathbf{M}_k\|_F + \varepsilon \|\mathbf{M}\|_F \quad (31)$$

with probability at least  $1 - \delta_2$ . Finally, note that when  $\alpha \leq 1/2$  and  $n_1 \leq n_2$  the bound in Lemma 3 is dominated by

$$\|\mathbf{M} - \widehat{\mathbf{M}}\|_2 \leq \|\mathbf{M}\|_F \cdot O\left(\sqrt{\frac{\mu_1}{m_2}} \log\left(\frac{n_1 + n_2}{\delta}\right)\right). \quad (32)$$

Consequently, for any  $\varepsilon' > 0$  if  $m_2 = \Omega((\varepsilon')^{-2} \mu_1 \log^2((n_1 + n_2)/\delta_3))$  we have with probability  $\geq 1 - \delta_3$

$$\|\mathbf{M} - \widehat{\mathbf{M}}\|_2 \leq \varepsilon' \|\mathbf{M}\|_F. \quad (33)$$

The proof is then completed by taking  $\varepsilon' = \varepsilon/\sqrt{s}$ :

$$\begin{aligned} \|\mathbf{M} - \mathbf{C}\mathbf{X}\|_F &= \|\mathbf{M} - \mathcal{P}_C(\widehat{\mathbf{M}})\|_F \\ &\leq \|\mathbf{M} - \mathcal{P}_C(\mathbf{M})\|_F + \|\mathcal{P}_C(\mathbf{M} - \widehat{\mathbf{M}})\|_F \\ &\leq \|\mathbf{M} - \mathbf{M}_k\|_F + \varepsilon \|\mathbf{M}\|_F + \sqrt{s} \|\mathcal{P}_C(\mathbf{M} - \widehat{\mathbf{M}})\|_2 \\ &\leq \|\mathbf{M} - \mathbf{M}_k\|_F + \varepsilon \|\mathbf{M}\|_F + \sqrt{s} \cdot \varepsilon' \|\mathbf{M}\|_F \\ &\leq \|\mathbf{M} - \mathbf{M}_k\|_F + 2\varepsilon \|\mathbf{M}\|_F. \end{aligned}$$

□

## Appendix B. Analysis of the active volume sampling algorithm

*Proof of Lemma 4.* We first prove Eq. (15). Observe that  $\dim(\mathcal{U}(C)) \leq s$ . Let  $\mathbf{R}_C = (\mathbf{R}^{(C(1))}, \dots, \mathbf{R}^{(C(s))}) \in \mathbb{R}^{n_1 \times s}$  denote the selected  $s$  columns in the noise matrix  $\mathbf{R}$  and let  $\mathcal{R}(C) = \text{span}(\mathbf{R}_C)$  denote the span of selected columns in  $\mathbf{R}$ . By definition,  $\mathcal{U}(C) \subseteq \mathcal{U} \cup \mathcal{R}(C)$ , where  $\mathcal{U} = \text{span}(\mathbf{A})$  denotes the subspace spanned by columns in the deterministic matrix  $\mathbf{A}$ . Consequently, we have the following bound on  $\|\mathcal{P}_{\mathcal{U}(C)} \mathbf{e}_i\|$  (assuming each entry in  $\mathbf{R}$  follows a zero-mean Gaussian distribution with  $\sigma^2$  variance):

$$\|\mathcal{P}_{\mathcal{U}(C)} \mathbf{e}_i\|_2^2 \leq \|\mathcal{P}_{\mathcal{U}} \mathbf{e}_i\|_2^2 + \|\mathcal{P}_{\mathcal{U}^\perp \cap \mathcal{R}(C)} \mathbf{e}_i\|_2^2$$

<sup>3</sup>The original theorem concerns random samples of rows; it is essentially the same for random samples of columns.

$$\begin{aligned}
 &\leq \|\mathcal{P}_{\mathcal{U}}\mathbf{e}_i\|_2^2 + \|\mathcal{P}_{\mathcal{R}(C)}\mathbf{e}_i\|_2^2 \\
 &\leq \frac{k\mu_0}{n_1} + \|\mathbf{R}_C\|_2^2 \|(\mathbf{R}_C^\top \mathbf{R}_C)^{-1}\|_2^2 \|\mathbf{R}_C^\top \mathbf{e}_i\|_2^2 \\
 &\leq \frac{k\mu_0}{n_1} + \frac{(\sqrt{n_1} + \sqrt{s} + \epsilon)^2 \sigma^2}{(\sqrt{n_1} - \sqrt{s} - \epsilon)^4 \sigma^4} \cdot \sigma^2 (s + 2\sqrt{s \log(2/\delta)} + 2\log(2/\delta)).
 \end{aligned}$$

For the last inequality we apply Lemma 13 to bound the largest and smallest singular values of  $\mathbf{R}_C$  and Lemma 11 to bound  $\|\mathbf{R}_C^\top \mathbf{e}_i\|_2^2$ , because  $\mathbf{R}_C^\top \mathbf{e}_i$  follow i.i.d. Gaussian distributions with covariance  $\sigma^2 \mathbf{I}_{s \times s}$ . If  $\epsilon$  is set as  $\epsilon = \sqrt{2 \log(4/\delta)}$  then the last inequality holds with probability at least  $1 - \delta$ . Furthermore, when  $s \leq n_1/2$  and  $\delta$  is not exponentially small (e.g.,  $\sqrt{2 \log(4/\delta)} \leq \frac{\sqrt{n_1}}{4}$ ), the fraction  $\frac{(\sqrt{n_1} + \sqrt{s} + \epsilon)^2}{(\sqrt{n_1} - \sqrt{s} - \epsilon)^4}$  is approximately  $O(1/n_1)$ . As a result, with probability  $1 - n_1\delta$  the following holds:

$$\begin{aligned}
 \mu(\mathcal{U}(C)) &= \frac{n_1}{s} \max_{1 \leq i \leq n_1} \|\mathcal{P}_{\mathcal{U}(C)}\mathbf{e}_i\|_2^2 \\
 &\leq \frac{n_1}{s} \left( \frac{k\mu_0}{n_1} + O\left(\frac{s + \sqrt{s \log(1/\delta)} + \log(1/\delta)}{n_1}\right) \right) = O\left(\frac{k\mu_0 + s + \sqrt{s \log(1/\delta)} + \log(1/\delta)}{s}\right). \quad (34)
 \end{aligned}$$

Finally, putting  $\delta' = n_1/\delta$  we prove Eq. (15).

Next we try to prove Eq. (16). Let  $\mathbf{x}$  be the  $i$ -th column of  $\mathbf{M}$  and write  $\mathbf{x} = \mathbf{a} + \mathbf{r}$ , where  $\mathbf{a} = \mathcal{P}_{\mathcal{U}}(\mathbf{x})$  and  $\mathbf{r} = \mathcal{P}_{\mathcal{U}^\perp}(\mathbf{x})$ . Since the deterministic component of  $\mathbf{x}$  lives in  $\mathcal{U}$  and the random component of  $\mathbf{x}$  is a vector with each entry sampled from i.i.d. zero-mean Gaussian distributions, we know that  $\mathbf{r}$  is also a zero-mean random Gaussian vector with i.i.d. sampled entries. Note that  $\mathcal{U}(C)$  does not depend on the randomness over  $\{\mathbf{M}^{(i)} : i \notin C\}$ . Therefore, in the following analysis we will assume  $\mathcal{U}(C)$  to be a fixed subspace  $\tilde{\mathcal{U}}$  with dimension at most  $s$ .

The projected vector  $\mathbf{x}' = \mathcal{P}_{\tilde{\mathcal{U}}^\perp} \mathbf{x}$  can be written as  $\tilde{\mathbf{x}} = \tilde{\mathbf{a}} + \tilde{\mathbf{r}}$ , where  $\tilde{\mathbf{a}} = \mathcal{P}_{\tilde{\mathcal{U}}^\perp} \mathbf{a}$  and  $\tilde{\mathbf{r}} = \mathcal{P}_{\tilde{\mathcal{U}}^\perp} \mathbf{r}$ . By definition,  $\tilde{\mathbf{a}}$  lives in the subspace  $\mathcal{U} \cap \tilde{\mathcal{U}}^\perp$ . So it satisfies the incoherence assumption

$$\mu(\tilde{\mathbf{a}}) = \frac{n_1 \|\tilde{\mathbf{a}}\|_\infty^2}{\|\tilde{\mathbf{a}}\|_2^2} \leq k\mu(\mathcal{U}) \leq k\mu_0. \quad (35)$$

On the other hand, because  $\tilde{\mathbf{r}}$  is an orthogonal projection of some random Gaussian variable,  $\tilde{\mathbf{r}}$  is still a Gaussian random vector, which lives in  $\mathcal{U}^\perp \cap \tilde{\mathcal{U}}^\perp$  with rank at least  $n_1 - k - s$ . Subsequently, we have

$$\begin{aligned}
 \mu(\tilde{\mathbf{x}}) &= n_1 \frac{\|\tilde{\mathbf{x}}\|_\infty^2}{\|\tilde{\mathbf{x}}\|_2^2} \leq 3n_1 \frac{\|\tilde{\mathbf{a}}\|_\infty^2 + \|\tilde{\mathbf{r}}\|_\infty^2}{\|\tilde{\mathbf{a}}\|_2^2 + \|\tilde{\mathbf{r}}\|_2^2} \\
 &\leq 3n_1 \frac{\|\tilde{\mathbf{a}}\|_\infty^2}{\|\tilde{\mathbf{a}}\|_2^2} + 3n_1 \frac{\|\tilde{\mathbf{r}}\|_\infty^2}{\|\tilde{\mathbf{r}}\|_2^2} \\
 &\leq 3k\mu_0 + \frac{6\sigma^2 n_1 \log(2n_1 n_2 / \delta)}{\sigma^2 (n_1 - k - s) - 2\sigma^2 \sqrt{(n_1 - k - s) \log(n_2 / \delta)}}.
 \end{aligned}$$

For the second inequality we use the fact that  $\frac{\sum_i a_i}{\sum_i b_i} \leq \sum_i \frac{a_i}{b_i}$  whenever  $a_i, b_i \geq 0$ . For the last inequality we use Lemma 12 on the numerator and Lemma 11 on the denominator. Finally, note that when  $\max(s, k) \leq n_1/4$  and  $\log(n_2/\delta) \leq n_1/64$  the denominator can be lower bounded by  $\sigma^2 n_1/4$ ; subsequently, we can bound  $\mu(\tilde{\mathbf{x}})$  as

$$\mu(\tilde{\mathbf{x}}) \leq 3k\mu_0 + \frac{24\sigma^2 n_1 \log(2n_1 n_2 / \delta)}{\sigma^2 n_1} \leq 3k\mu_0 + 24 \log(2n_1 n_2 / \delta). \quad (36)$$

Taking a union bound over all  $n_2 - s$  columns yields the result.  $\square$

To prove the norm estimation consistency result in Lemma 5 we first cite a seminal theorem from [20] which provides a tight error bound on a subsampled projected vector in terms of the norm of the true projected vector.

**Theorem 4.** Let  $\mathcal{U}$  be a  $k$ -dimensional subspace of  $\mathbb{R}^n$  and  $\mathbf{y} = \mathbf{x} + \mathbf{v}$ , where  $\mathbf{x} \in \mathcal{U}$  and  $\mathbf{v} \in \mathcal{U}^\perp$ . Fix  $\delta' > 0$ ,  $m \geq \max\{\frac{8}{3}k\mu(\mathcal{U}) \log(\frac{2k}{\delta'}), 4\mu(\mathbf{v}) \log(1/\delta')\}$  and let  $\Omega$  be an index set with entries sampled uniformly with replacement with probability  $m/n$ . Then with probability at least  $1 - 4\delta'$ :

$$\frac{m(1-\alpha) - k\mu(\mathcal{U})\frac{\beta}{1-\gamma}}{n} \|\mathbf{v}\|_2^2 \leq \|\mathbf{y}_\Omega - \mathcal{P}_{U_\Omega} \mathbf{y}_\Omega\|_2^2 \leq (1+\alpha) \frac{m}{n} \|\mathbf{v}\|_2^2, \quad (37)$$

where  $\alpha = \sqrt{2\frac{\mu(\mathbf{v})}{m} \log(1/\delta')} + 2\frac{\mu(\mathbf{v})}{3m} \log(1/\delta')$ ,  $\beta = (1 + 2\sqrt{\log(1/\delta')})^2$  and  $\gamma = \sqrt{\frac{8k\mu(\mathcal{U})}{3m} \log(2k/\delta')}$ .

We are now ready to prove Lemma 5.

*Proof of Lemma 5.* By Algorithm 2, we know that  $\dim(\mathcal{S}_t) = t$  with probability 1. Let  $\mathbf{y} = \mathbf{M}^{(i)}$  denote the  $i$ -th column of  $\mathbf{M}$  and let  $\mathbf{v} = \mathcal{P}_{\mathcal{S}_t} \mathbf{y}$  be the projected vector. We can apply Theorem 4 to bound the estimation error between  $\|\mathbf{v}\|$  and  $\|\mathbf{y}_\Omega - \mathcal{P}_{\mathcal{S}_t(\Omega)} \mathbf{y}_\Omega\|$ .

First, when  $m$  is set as in Eq. (19) it is clear that the conditions  $m \geq \frac{8}{3}t\mu(\mathcal{U}) \log(\frac{2t}{\delta'}) = \Omega(k\mu_0 \log(n/\delta) \log(k/\delta'))$  and  $m \geq 4\mu(\mathbf{v}) \log(1/\delta') = \Omega(k\mu_0 \log(n/\delta) \log(1/\delta'))$  are satisfied. We next turn to the analysis of  $\alpha$ ,  $\beta$  and  $\gamma$ . More specifically, we want  $\alpha = O(1)$ ,  $\gamma = O(1)$  and  $\frac{t\mu(\mathcal{U})}{m} \beta = O(1)$ .

For  $\alpha$ ,  $\alpha = O(1)$  implies  $m = \Omega(\mu(\mathbf{v}) \log(1/\delta')) = \Omega(k\mu_0 \log(n/\delta) \log(1/\delta'))$ . Therefore, by carefully selecting constants in  $\Omega(\cdot)$  we can make  $\alpha \leq 1/4$ .

For  $\gamma$ ,  $\gamma = O(1)$  implies  $m = \Omega(t\mu(\mathcal{U}) \log(t/\delta')) = \Omega(k\mu_0 \log(n/\delta) \log(k/\delta'))$ . By carefully selecting constants in  $\Omega(\cdot)$  we can make  $\gamma \leq 0.2$ .

For  $\beta$ ,  $\frac{t\mu(\mathcal{U})}{m} \beta = O(1)$  implies  $m = O(t\mu(\mathcal{U}) \beta) = O(k\mu_0 \log(n/\delta) \log(1/\delta'))$ . By carefully selecting constants we can have  $\beta \leq 0.2$ . Finally, combining bounds on  $\alpha$ ,  $\beta$  and  $\gamma$  we prove the desired result.  $\square$

Before proving Lemma 6, we first cite a lemma from [9] that connects the volume of a simplex to the permutation sum of singular values.

**Lemma 8** ([9]). Fix  $\mathbf{A} \in \mathbb{R}^{m \times n}$  with  $m \leq n$ . Suppose  $\sigma_1, \dots, \sigma_m$  are singular values of  $\mathbf{A}$ . Then

$$\sum_{S \subseteq [n], |S|=k} \text{vol}(\Delta(S))^2 = \frac{1}{(k!)^2} \sum_{1 \leq i_1 < i_2 < \dots < i_k \leq m} \sigma_{i_1}^2 \sigma_{i_2}^2 \dots \sigma_{i_k}^2. \quad (38)$$

Now we are ready to prove Lemma 6.

*Proof of Lemma 6.* Let  $\mathbf{M}_k$  denote the best rank- $k$  approximation of  $\mathbf{M}$  and assume the singular values of  $\mathbf{M}$  are  $\{\sigma_i\}_{i=1}^{n_1}$ . Let  $C = \{i_1, \dots, i_k\}$  be the selected columns. Let  $\tau \in \Pi_k$ , where  $\Pi_k$  denotes all permutations with  $k$  elements. By  $\mathcal{H}_{\tau,t}$  we denote the linear subspace spanned by  $\{\mathbf{M}^{(\tau(i_1))}, \dots, \mathbf{M}^{(\tau(i_k))}\}$  and let  $d(\mathbf{M}^{(i)}, \mathcal{H}_{\tau,t})$  denote the distance between column  $\mathbf{M}^{(i)}$  and subspace  $\mathcal{H}_{\tau,t}$ . We then have

$$\begin{aligned} \hat{p}_C &\leq \sum_{\tau \in \Pi_k} \left(\frac{5}{2}\right)^k \frac{\|\mathbf{M}^{(\tau(i_1))}\|_2^2}{\|\mathbf{M}\|_F^2} \frac{d(\mathbf{M}^{(\tau(i_2))}, \mathcal{H}_{\tau,1})^2}{\sum_{i=1}^{n_2} d(\mathbf{M}^{(i)}, \mathcal{H}_{\tau,1})^2} \dots \frac{d(\mathbf{M}^{(\tau(i_k))}, \mathcal{H}_{\tau,k-1})^2}{\sum_{i=1}^{n_2} d(\mathbf{M}^{(i)}, \mathcal{H}_{\tau,k-1})^2} \\ &\leq 2.5^k \cdot \frac{\sum_{\tau \in \Pi_k} \|\mathbf{M}^{(\tau(i_1))}\|_2^2 d(\mathbf{M}^{(\tau(i_2))}, \mathcal{H}_{\tau,1})^2 \dots d(\mathbf{M}^{(\tau(i_k))}, \mathcal{H}_{\tau,k-1})^2}{\|\mathbf{M}\|_F^2 \|\mathbf{M} - \mathbf{M}_1\|_F^2 \dots \|\mathbf{M} - \mathbf{M}_{k-1}\|_F^2} \\ &= 2.5^k \cdot \frac{\sum_{\tau \in \Pi_k} (k!)^2 \text{vol}(\Delta(C))^2}{\|\mathbf{M}\|_F^2 \|\mathbf{M} - \mathbf{M}_1\|_F^2 \dots \|\mathbf{M} - \mathbf{M}_{k-1}\|_F^2} \\ &= 2.5^k \cdot \frac{(k!)^3 \text{vol}(\Delta(C))^2}{\sum_{i=1}^{n_1} \sigma_i^2 \sum_{i=2}^{n_1} \sigma_i^2 \dots \sum_{i=k}^{n_1} \sigma_i^2} \\ &\leq 2.5^k \cdot \frac{(k!)^3 \text{vol}(\Delta(C))^2}{\sum_{1 \leq i_1 < i_2 < \dots < i_k \leq n_1} \sigma_{i_1}^2 \sigma_{i_2}^2 \dots \sigma_{i_k}^2} \\ &= 2.5^k \cdot \frac{k! \text{vol}(\Delta(C))^2}{\sum_{T:|T|=k} \text{vol}(\Delta(T))^2} = 2.5^k k! p_C. \end{aligned}$$

For the first inequality we apply Eq. (22) and for the second to last inequality we apply Lemma 8.  $\square$

To prove the approximation error bound in Lemma 7 we need the following two technical lemmas, cited from [19, 3].

**Lemma 9** ([19]). *Suppose  $\mathcal{U} \subseteq \mathbb{R}^n$  has dimension  $k$  and  $\mathbf{U} \in \mathbb{R}^{n \times k}$  is the orthogonal matrix associated with  $\mathcal{U}$ . Let  $\Omega \subseteq [n]$  be a subset of indices each sampled from i.i.d. Bernoulli distributions with probability  $m/n_1$ . Then for some vector  $\mathbf{y} \in \mathbb{R}^n$ , with probability at least  $1 - \delta$ :*

$$\|\mathbf{U}_\Omega^\top \mathbf{y}_\Omega\|_2^2 \leq \beta \frac{m}{n_1} \frac{k\mu(\mathcal{U})}{n_1} \|\mathbf{y}\|_2^2, \quad (39)$$

where  $\beta$  is defined in Theorem 4.

**Lemma 10** ([3]). *With the same notation in Lemma 9 and Theorem 4. With probability  $\geq 1 - \delta$  one has*

$$\|(\mathbf{U}_\Omega^\top \mathbf{U}_\Omega)^{-1}\| \leq \frac{n_1}{(1 - \gamma)m}, \quad (40)$$

provided that  $\gamma < 1$ .

Now we can prove Lemma 7.

*Proof of Lemma 7.* Let  $\mathcal{U} = \mathcal{U}(C)$  and  $\mathbf{U} \in \mathbb{R}^{n_1 \times k}$  be the orthogonal matrix associated with  $\mathcal{U}$  (note that with probability one  $\dim(\mathcal{U}) = k$ ). Fix a column  $i$  and let  $\mathbf{x} = \mathbf{M}^{(i)} = \mathbf{a} + \mathbf{r}$ , where  $\mathbf{a} \in \mathcal{U}$  and  $\mathbf{r} \in \mathcal{U}^\perp$ . What we want is to bound  $\|\mathbf{x} - \mathbf{U}(\mathbf{U}_\Omega^\top \mathbf{U}_\Omega)^{-1} \mathbf{U}_\Omega^\top \mathbf{x}_\Omega\|_2^2$  in terms of  $\|\mathbf{r}\|_2^2$ .

Write  $\mathbf{a} = \mathbf{U}\tilde{\mathbf{a}}$ . By Lemma 10, if  $m$  satisfies the condition given in the Lemma then with probability over  $1 - \delta - \delta''$  we know  $(\mathbf{U}_\Omega^\top \mathbf{U}_\Omega)$  is invertible and furthermore,  $\|(\mathbf{U}_\Omega^\top \mathbf{U}_\Omega)^{-1}\|_2 \leq 2n_1/m$ . Consequently,

$$\mathbf{U}(\mathbf{U}_\Omega^\top \mathbf{U}_\Omega)^{-1} \mathbf{U}_\Omega^\top \mathbf{a}_\Omega = \mathbf{U}(\mathbf{U}_\Omega^\top \mathbf{U}_\Omega)^{-1} \mathbf{U}_\Omega^\top \mathbf{U}_\Omega \tilde{\mathbf{a}} = \mathbf{U}\tilde{\mathbf{a}} = \mathbf{a}. \quad (41)$$

That is, the subsampled projector preserves components of  $\mathbf{x}$  in subspace  $\mathcal{U}$ .

Now let's consider the noise term  $\mathbf{r}$ . By Corollary 1 with probability  $\geq 1 - \delta$  we can bound the incoherence level of  $\mathcal{U}$  as  $\mu(\mathcal{U}) = O(k\mu_0 \log(n/\delta))$ . The incoherence of subspace  $\mathcal{U}$  can also be bounded as  $\mu(\mathcal{U}) = O(\mu_0 \log(n/\delta))$ . Subsequently, given  $m = \Omega(k\mu_0 \log(n/\delta) \log(n/\delta''))$  we have (with probability  $\geq 1 - \delta - 2\delta''$ )

$$\begin{aligned} & \|\mathbf{x} - \mathbf{U}(\mathbf{U}_\Omega^\top \mathbf{U}_\Omega)^{-1} \mathbf{U}_\Omega^\top (\mathbf{a} + \mathbf{r})\|_2^2 \\ &= \|\mathbf{a} + \mathbf{r} - \mathbf{U}(\mathbf{U}_\Omega^\top \mathbf{U}_\Omega)^{-1} \mathbf{U}_\Omega^\top (\mathbf{a} + \mathbf{r})\|_2^2 \\ &= \|\mathbf{r} - \mathbf{U}(\mathbf{U}_\Omega^\top \mathbf{U}_\Omega)^{-1} \mathbf{U}_\Omega^\top \mathbf{r}\|_2^2 \\ &\leq \|\mathbf{r}\|_2^2 + \|(\mathbf{U}_\Omega^\top \mathbf{U}_\Omega)^{-1}\|_2^2 \|\mathbf{U}_\Omega^\top \mathbf{r}\|_2^2 \\ &\leq (1 + O(1))\|\mathbf{r}\|_2^2. \end{aligned}$$

For the second to last inequality we use the fact that  $\mathbf{r} \in \mathcal{U}^\perp$ . By carefully selecting constants in Eq. (21) we can make

$$\|\mathbf{x} - \mathbf{U}(\mathbf{U}_\Omega^\top \mathbf{U}_\Omega)^{-1} \mathbf{U}_\Omega^\top \mathbf{x}\|_2^2 \leq 2.5 \|\mathcal{P}_{\mathcal{U}^\perp} \mathbf{x}\|_2^2. \quad (42)$$

Summing over all  $n_2$  columns yields the desired result.  $\square$

## Appendix C. Some concentration inequalities

**Lemma 11** ([21]). *Let  $X \sim \chi_d^2$ . Then with probability  $\geq 1 - 2\delta$  the following holds:*

$$-2\sqrt{d \log(1/\delta)} \leq X - d \leq 2\sqrt{d \log(1/\delta)} + 2 \log(1/\delta). \quad (43)$$

**Lemma 12.** *Let  $X_1, \dots, X_n \sim \mathcal{N}(0, \sigma^2)$ . Then with probability  $\geq 1 - \delta$  the following holds:*

$$\max_i |X_i| \leq \sigma \sqrt{2 \log(2n/\delta)}. \quad (44)$$

**Lemma 13** ([23]). *Let  $\mathbf{X}$  be an  $n \times t$  random matrix with i.i.d. standard Gaussian random entries. If  $t < n$  then for every  $\epsilon \geq 0$  with probability  $\geq 1 - 2\exp(-\epsilon^2/2)$  the following holds:*

$$\sqrt{n} - \sqrt{t} - \epsilon \leq \sigma_{\min}(\mathbf{X}) \leq \sigma_{\max}(\mathbf{X}) \leq \sqrt{n} + \sqrt{t} + \epsilon. \quad (45)$$
